# Supplementary material
Source: PubMed Central journal article supplement (PMC6882335)
Supplement: NIHMS1058522-supplement-Supplemental_Figures.pdf [file NIHMS1058522-supplement-Supplemental_Figures.pdf]

**Supporting Information:**

*Generating fatty acid profiles in the gas-phase: fatty acid identification and relative quantitation using ion/ion charge inversion chemistry*

Caitlin E. Randolph<sup>†</sup>, David J. Foreman<sup>†</sup>, Stephen J. Blanksby<sup>‡</sup>, and Scott A. McLuckey<sup>†,\*</sup>

<sup>†</sup>Department of Chemistry, Purdue University, West Lafayette, Indiana 47907-2084, United States

<sup>‡</sup>Central Analytical Research Facility, Institute for Future Environments, Queensland University of Technology, Brisbane, QLD 4000, Australia

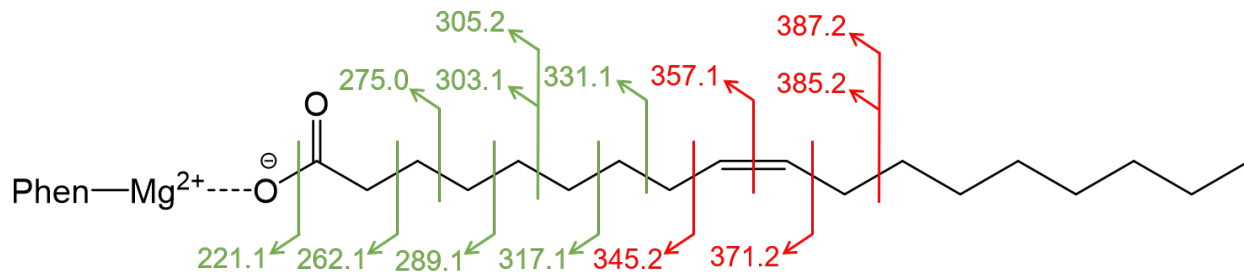

**Figure S1.** Structure and fragmentation pattern of  $[FA - H + MgPhen]^+$  ion where FA = 18:1(9Z) (*i.e.* the *n*-9 isomer).

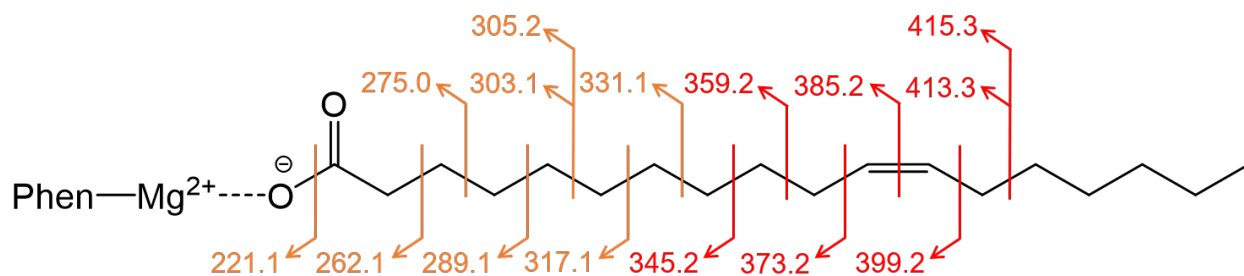

**Figure S2.** Structure and fragmentation pattern of  $[FA - H + MgPhen]^+$  ion where FA = 18:1(11Z) (*i.e.* the *n*-7 isomer).

Theoretical: 15/85 18:1 *n-9/n-7*

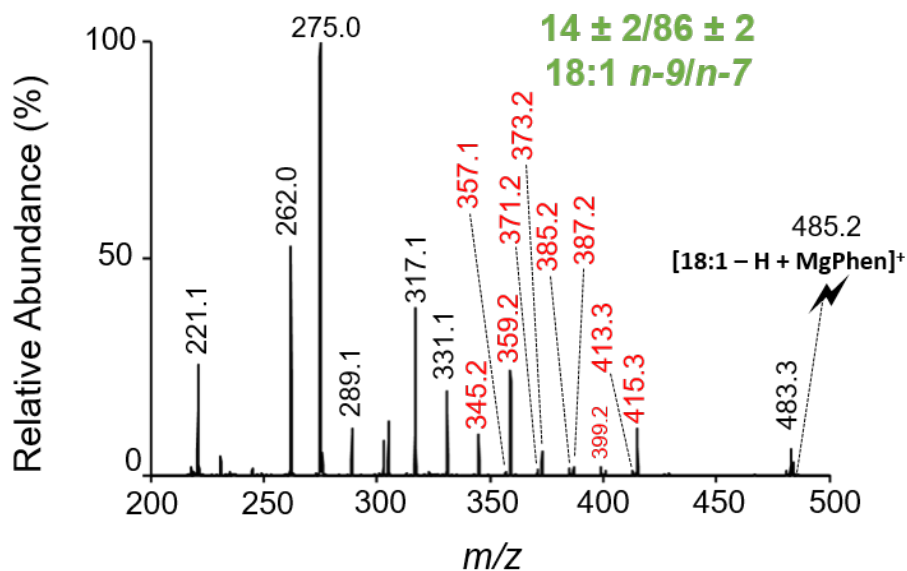

**Figure S3.** CID spectrum of  $[18:1 - H + MgPhen]^+$  for the 15/85 *n-9/n-7* 18:1 FA mixture. Diagnostic product ions for relative quantitation are shown in red. The lightning bolt signifies the precursor ion collisionally activated. The calculated relative composition is shown in green.

**Theoretical: 50/50 18:1 *n*-9/*n*-7**

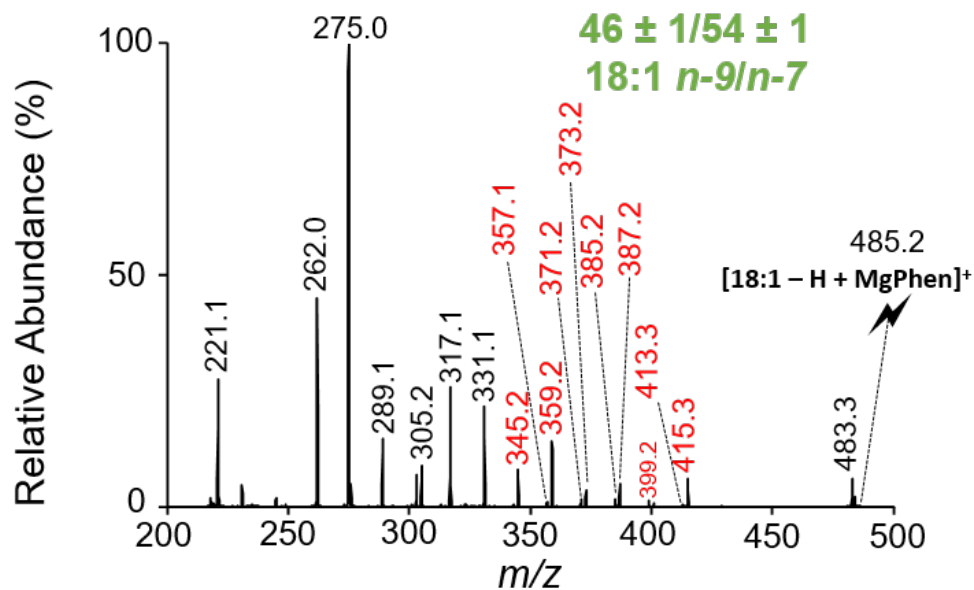

**Figure S4.** CID spectrum of [18:1 - H + MgPhen]<sup>+</sup> for the 50/50 *n*-9/*n*-7 18:1 FA mixture. Diagnostic product ions for relative quantitation are shown in red. The lightning bolt signifies the precursor ion collisionally activated. The calculated relative composition is shown in green.

### Theoretical: 85/15 18:1 *n-9/n-7*

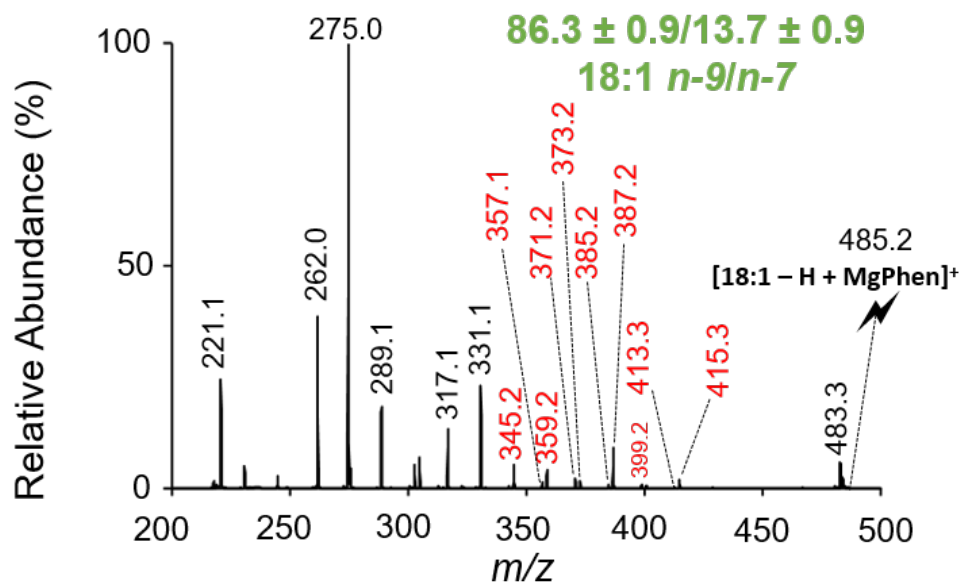

**Figure S5.** CID spectrum of [18:1 - H + MgPhen]<sup>+</sup> for the 85/15 *n-9/n-7* 18:1 FA mixture. Diagnostic product ions for relative quantitation are shown in red. The lightning bolt signifies the precursor ion collisionally activated. The calculated relative composition is shown in green.

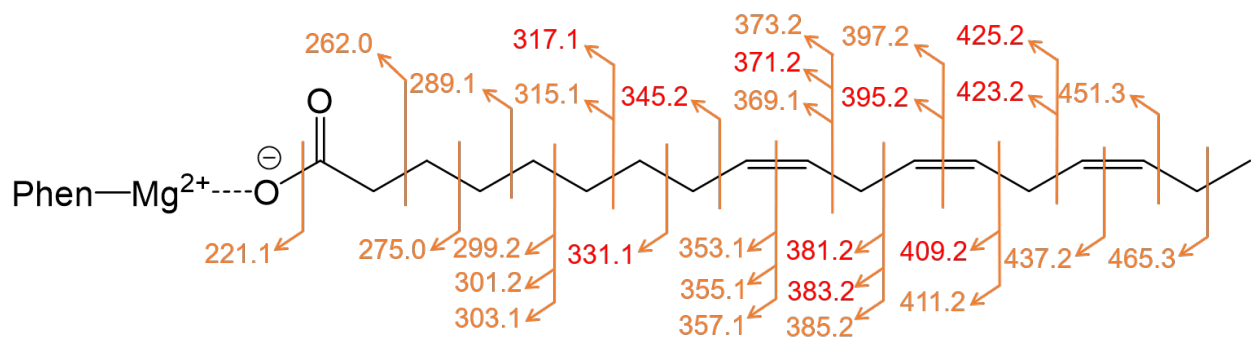

**Figure S6.** Structure and fragmentation pattern of  $[FA - H + MgPhen]^+$  ion where FA = 18:3(9Z,12Z,15Z) (*i.e.* the *n*-3 isomer).

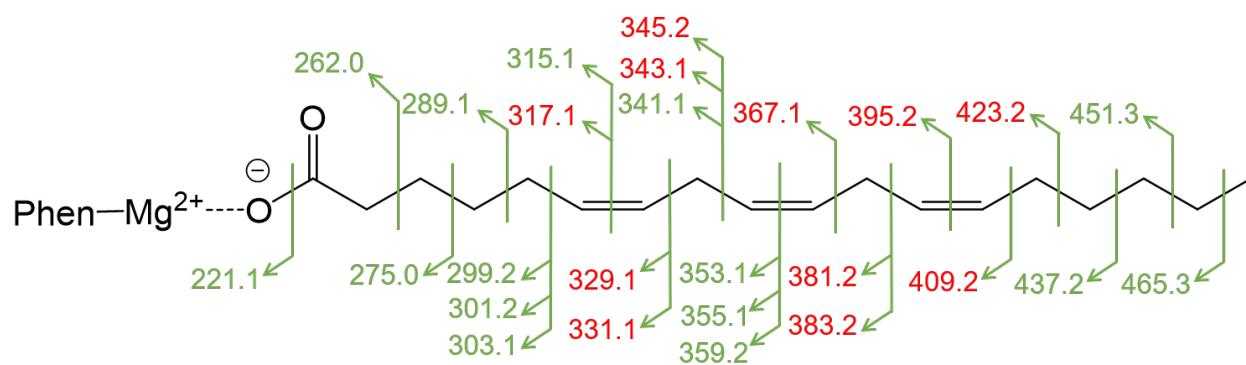

**Figure S7.** Structure and fragmentation pattern of  $[FA - H + MgPhen]^+$  ion where FA = 18:3(6Z,9Z,12Z) (*i.e.* the *n*-6 isomer).

### Theoretical: 50/50 18:3 *n-3/n-6*

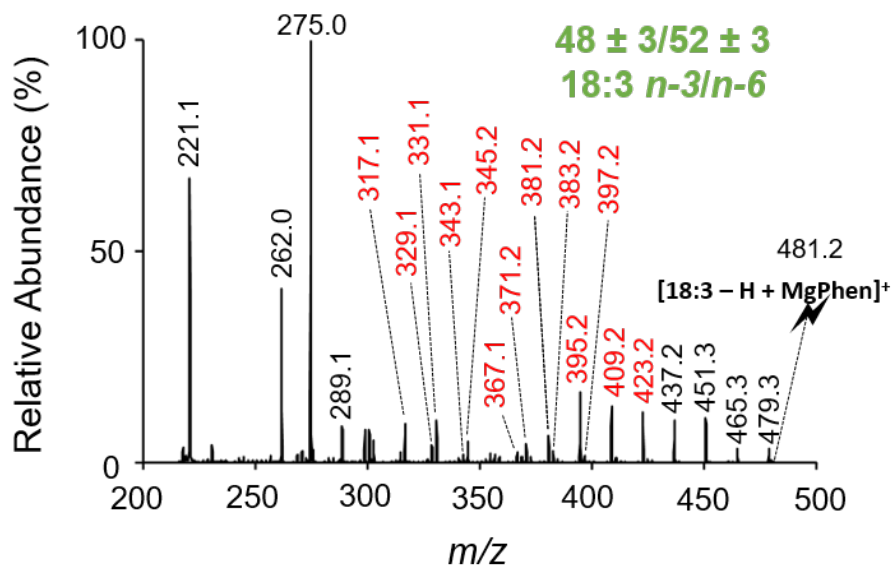

**Figure S8.** CID spectrum of  $[18:3 - H + MgPhen]^+$  for the 50/50 *n-3/n-6* 18:3 FA mixture. Diagnostic product ions for relative quantitation are shown in red. The lightning bolt signifies the precursor ion collisionally activated. The calculated relative composition is shown in green.

### Theoretical: 85/15 18:3 *n*-3/*n*-6

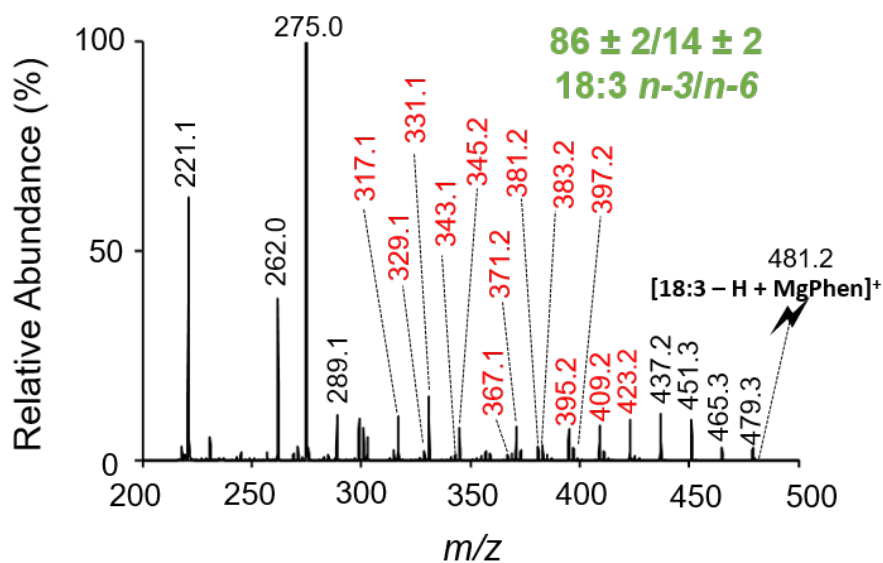

**Figure S9.** CID spectrum of [18:3 - H + MgPhen]<sup>+</sup> for the 85/15 *n*-3/*n*-6 18:3 FA mixture. Diagnostic product ions for relative quantitation are shown in red. The lightning bolt signifies the precursor ion collisionally activated. The calculated relative composition is shown in green.



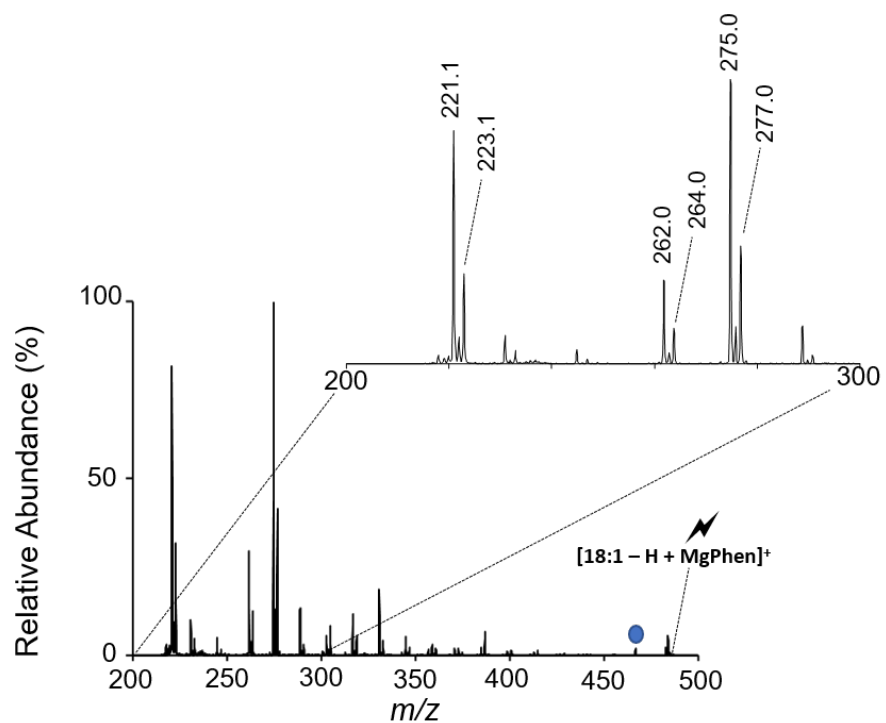

**Figure S10.** CID spectrum of  $[18:1 - H + MgPhen]^+$  ( $m/z$  485.2) derived from bovine liver extract. The blue circle represents a water loss from an ion isobaric to the charge-inverted 18:1 FA complex cation. There are notable +2 Da peaks observed at  $m/z$  223.1, 264.0, and 277.0 due to the third isotope of the 18:2 FA in BLE.

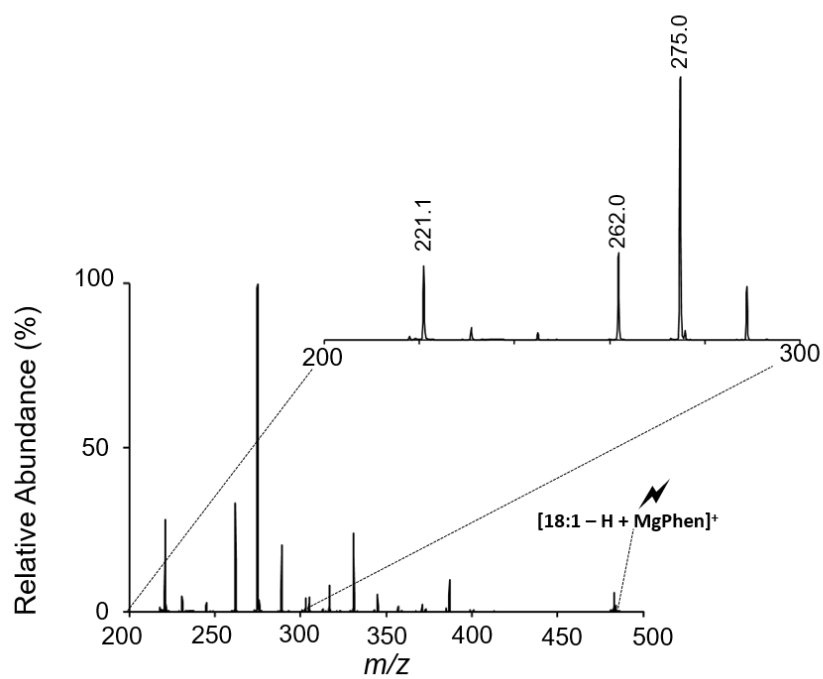

**Figure S11.** CID spectrum of  $[18:1 - H + MgPhen]^+$  ( $m/z$  485.2) derived from pure 18:1(9) standard. Note the absence of the notable +2 Da peaks at  $m/z$  223.1, 264.0, and 277.0. Instead, only the product ions at  $m/z$  221.1, 262.0, and 275.0 are observed.

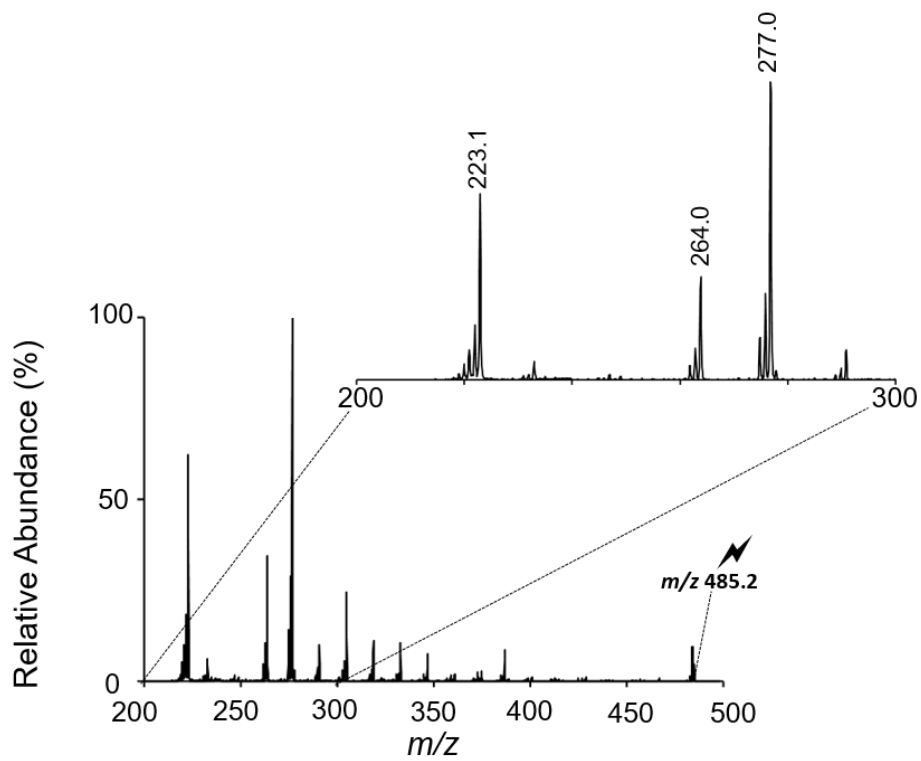

**Figure S12.** CID of the third isotope of  $[18:2 - H + MgPhen]^+$  ( $m/z$  485.2) derived from a pure 18:2 FA standard. Note the presence of the product ions  $m/z$  223.1, 264.0, and 277.0 in the low mass region of the CID spectrum.

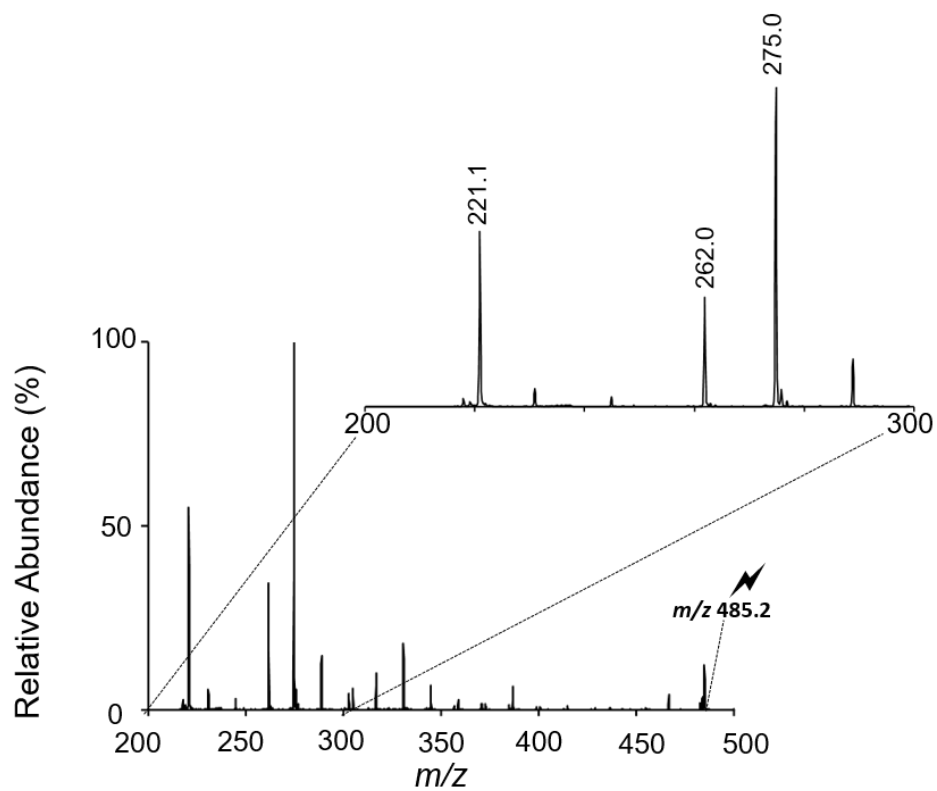

**Figure S13.** CID of the  $[18:2 - H + MgPhen]^+$  ( $m/z$  485.2) derived from bovine liver extract following monoisotopic isolation of the  $[Mg(Phen)_3]^{2+}$  charge-inversion reagent prior to the ion/ion reaction. Note the absence of the product ions  $m/z$  223.1, 264.0, and 277.0 in the low mass region of the CID spectrum.

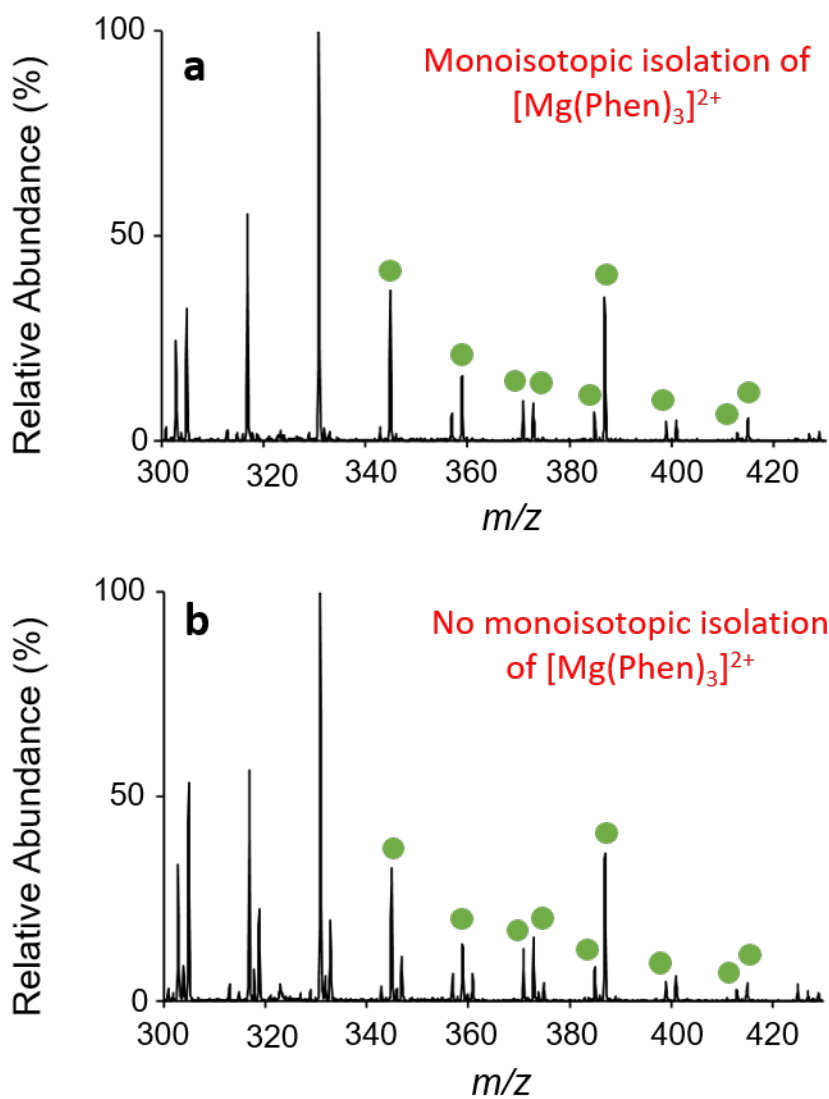

**Figure S14.** Enlargements of CID of the  $[\text{18:1} - \text{H} + \text{MgPhen}]^+$  ( $m/z$  485.2) derived from bovine liver extract over the diagnostic product ion  $m/z$  region (a) with monoisotopic isolation of the  $[\text{Mg}(\text{Phen})_3]^{2+}$  charge-inversion reagent prior to the ion/ion reaction and (b) without monoisotopic isolation of the  $[\text{Mg}(\text{Phen})_3]^{2+}$  charge-inversion reagent prior to the ion/ion reaction. Diagnostic product ions used for the relative quantitation of 18:1 FA isomers are shown with green circles.
